# Supplementary material for: Core-Shell Nanofiber Containing Large Amount of Flame Retardants via Coaxial Dual-Nozzle Electrospinning as Battery Separators
Source: Preprints.org preprint supplement (doi:10.20944/preprints201907.0201.v1), 2019-07-17
Supplement: Supplementary file 1 [file supplementary]

**Supplementary Materials**

**Core-Shell Nanofiber Containing Large Amount of Flame Retardants via Coaxial Dual-Nozzle Electrospinning as Battery Separators**

**
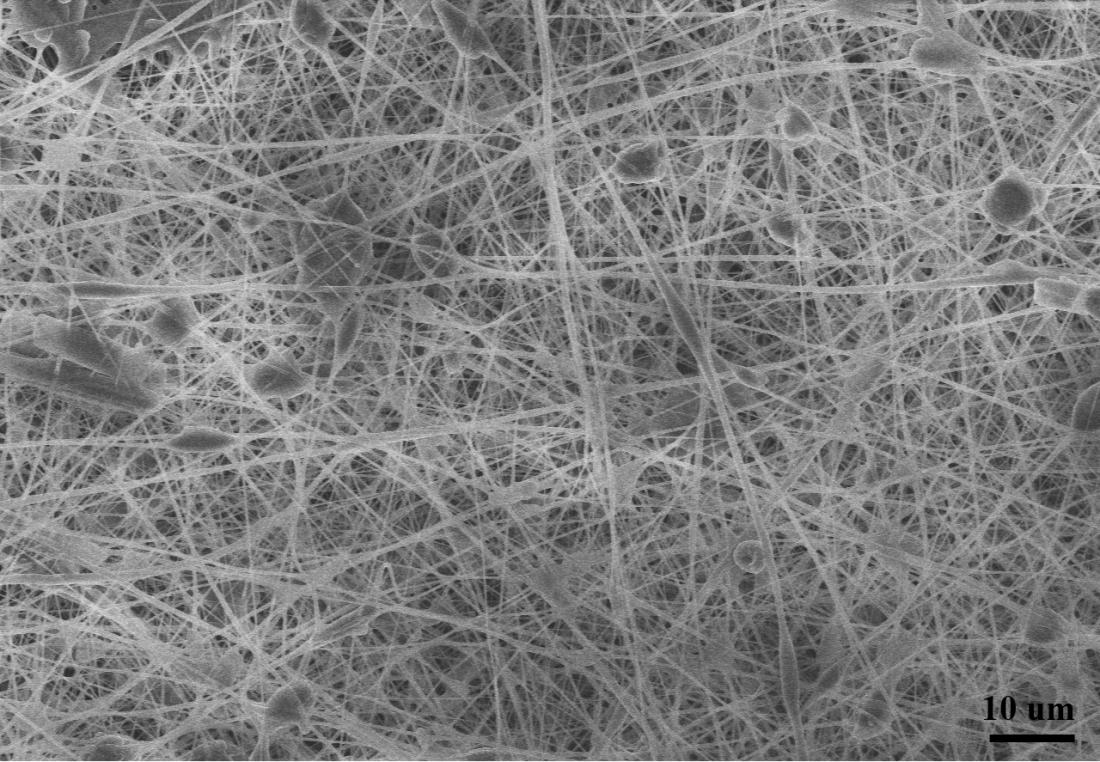
**

**Figure S1.** The morphology of the as-prepared TPP@PVDF-HFP when the Taylor cone was unstable.


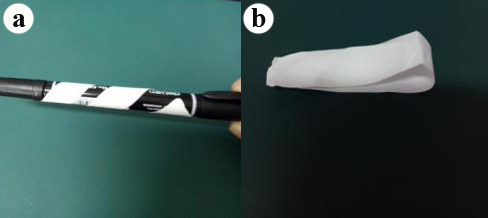


**Figure S2.** The test of the flexibility of TPP@PVDF-HFP fiber network by (**a**) rolling up on a pen or (**b**) after folding several times.


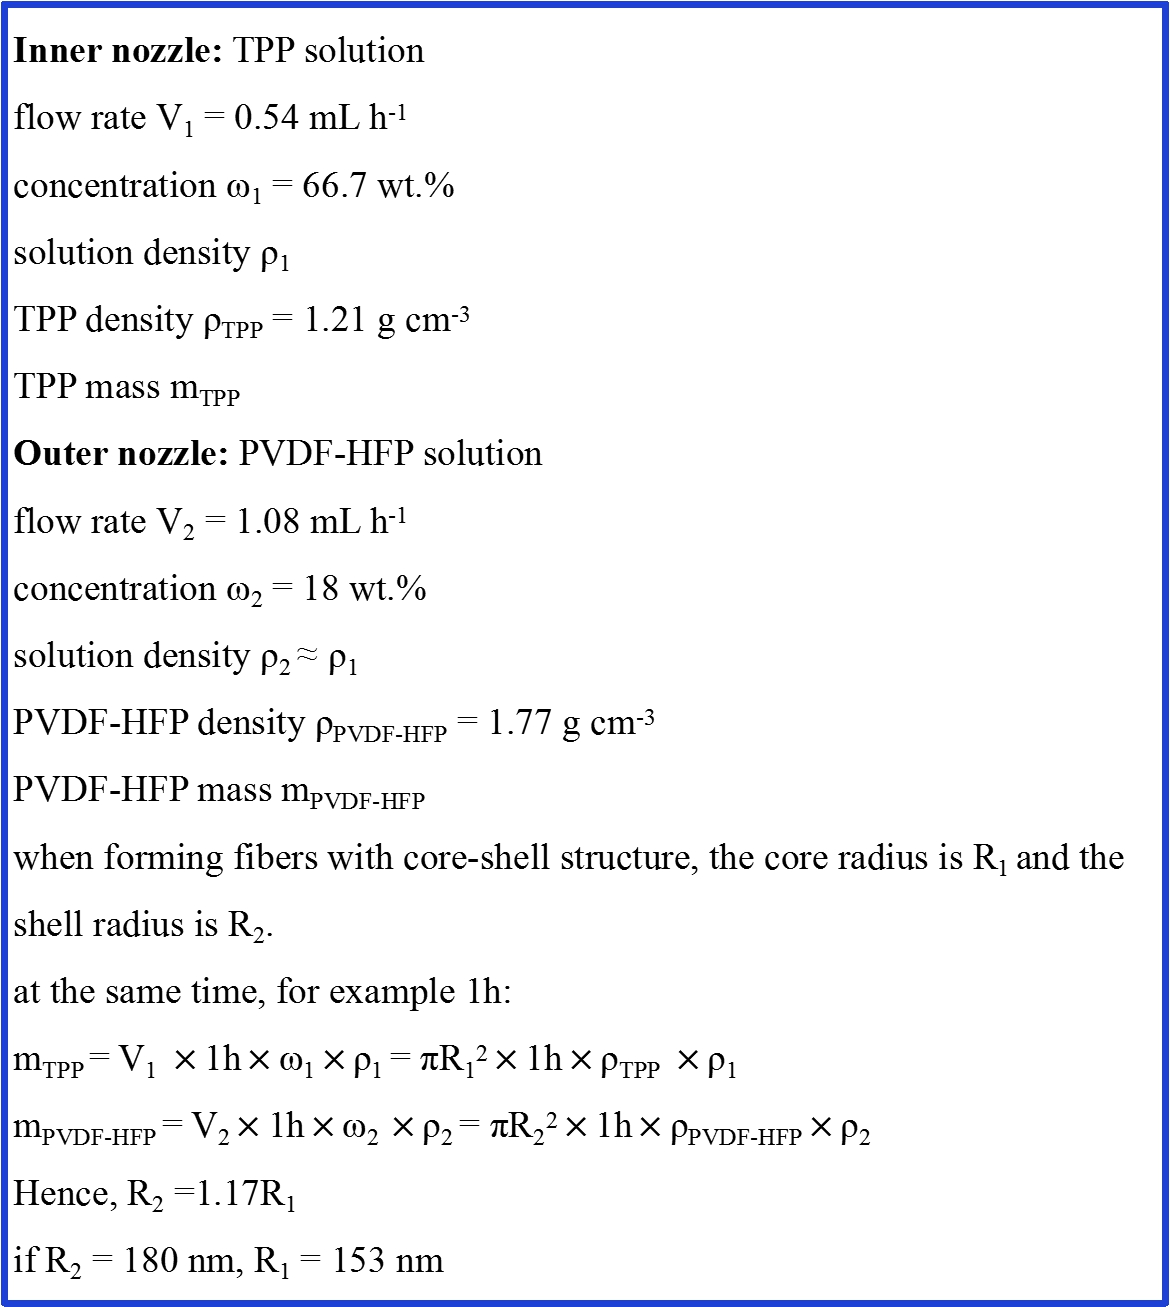


**Figure S3.** The calculation of dimensions for a single fiber of TPP@PVDF-HFP fiber network.

**
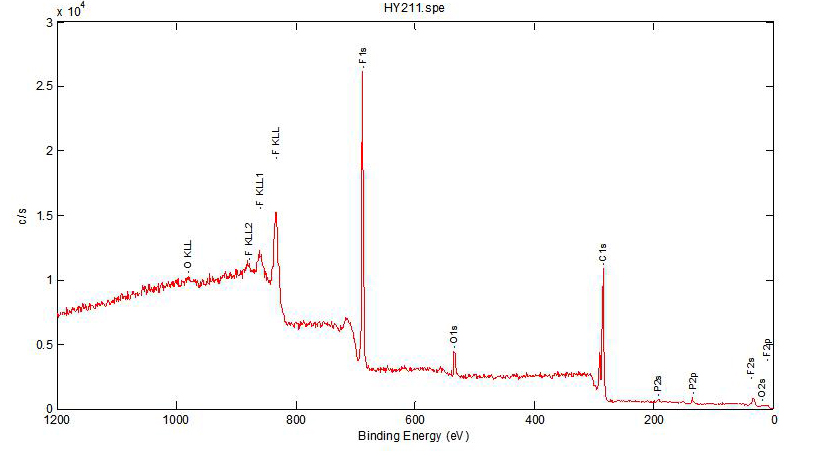
**

**Figure S4.** The XPS data of the TPP@PVDF-HFP fiber network after thermal stimuli.


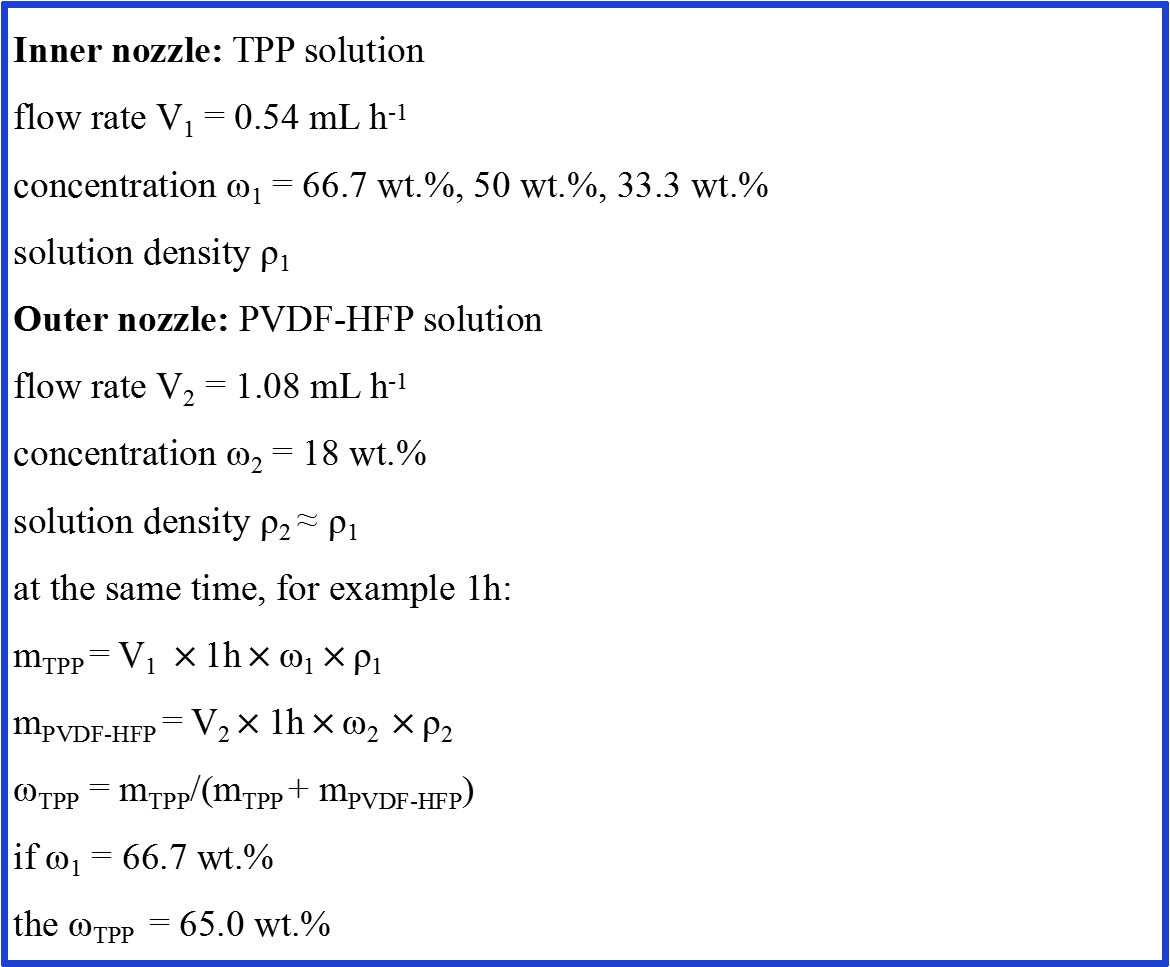


**Figure S5.** The theoretical calculation of overall TPP mass fraction in the TPP@PVDF-HFP fiber network.

**
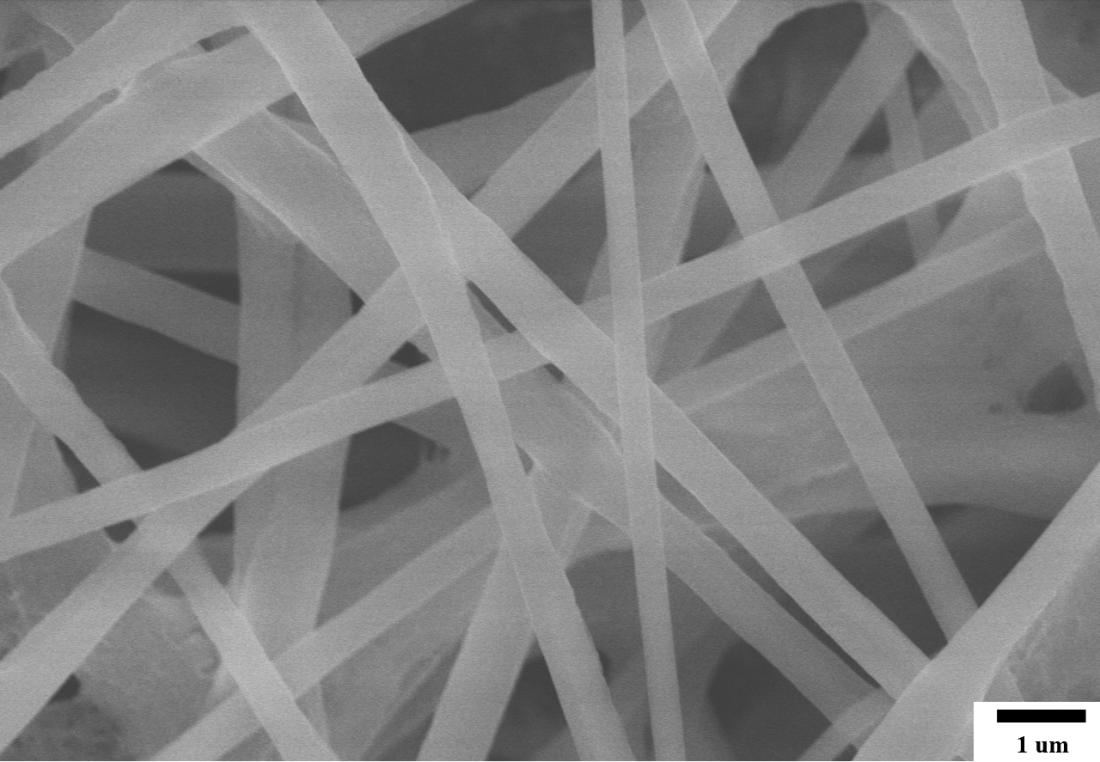
**

**Figure S6.** The SEM image of electrospun nanofibers on the commercial Celgard 2320 separator denoted as TPP@PVDF-HFP@commercial separator.

**Movie. S1**

Full process of ignition experiments on TPP@PVDF-HFP fibers.

**Movie. S2**

Full process of ignition experiments on TPP@PVDF-HFP@commercial separators fibers.

**Movie. S3**

Full process of ignition experiments on commercial separator type I (Celgard 2320).

**Movie. S4**

Full process of ignition experiments on commercial separator type II (Celgard 2500).
